# Supplementary material for: A novel orange-yellow-emitting Ba3Lu(PO4)3:Eu2+,Mn2+phosphor with energy transfer for UV-excited white LEDs
Source: Royal Society of Chemistry journal article supplement (doi:10.1039/c2dt31657a), 2012-10-04
Supplement: c2dt31657a.pdf [file c2dt31657a.pdf]

## Electronic supplementary information (ESI)

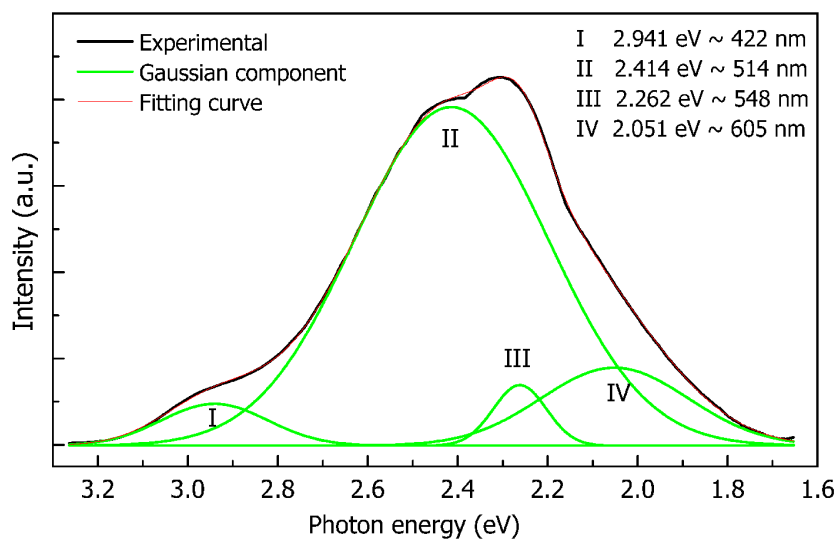

**Figure S1.** The emission spectrum of BLuP:0.005Eu<sup>2+</sup> and its Gaussian components on an energy scale.

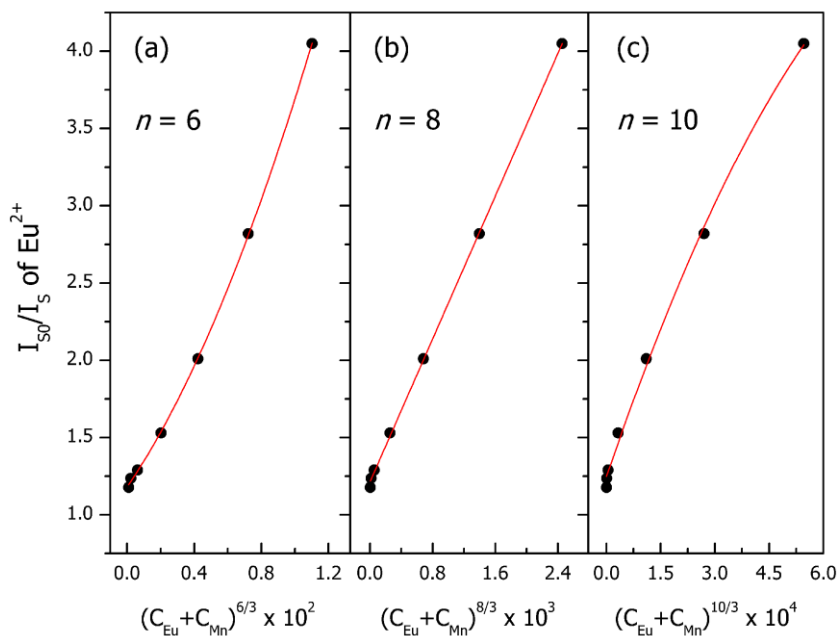

**Figure S2.** Dependence of  $I_{S0}/I_S$  of Eu<sup>2+</sup> on (a)  $C^{6/3}$ , (b)  $C^{8/3}$ , and (c)  $C^{10/3}$ .
